# Supplementary material for: A retrospective study comparing super-mini percutaneous nephrolithotomy and flexible ureteroscopy for the treatment of 20–30 mm renal stones in obese patients
Source: PeerJ. 2020 Feb 10;8:e8532. doi: 10.7717/peerj.8532 (PMC7017787; doi:10.7717/peerj.8532)
Supplement: Supplemental Information 1 [file peerj-08-8532-s001.xlsx]

## Sheet: Sheet1
sex	age	BMI	stone size(mm)	stone Ct value	side	stone number	location	ASA score	operation time	length of stay(d)(post-operative)	overal cost	complications	procedures	primary SFR	3-month SFR
male	58	31	25	1227	L	multiple	multiple	1	100	2	92050.6	/	2	N	N
male	48	35	23	465	L	multiple	pelvis	2	80	3	45001.2	/	1	N	Y
female	42	33	21	699	L	multiple	pelvis	1	90	3	44342	/	1	Y	Y
male	41	39	22	664	R	single	lower	1	110	3	93405.6	GradeI	2	N	Y
female	50	32	28	671	R	single	pelvis	2	70	2	43874.4	/	1	N	Y
female	26	30	20	794	R	single	pelvis	2	75	3	46874.3	/	1	N	Y
male	44	38	25	1173	R	multiple	pelvis	2	100	3	94700.4	GradeI	2	N	Y
male	30	35	26	1016	R	multiple	multiple	2	120	3	45342.6	/	1	Y	Y
male	44	33.2	20	1123	L	single	pelvis	2	85	2	47564.2	/	1	Y	Y
male	56	32.6	21	1340	L	single	upper	1	90	4	93980.6	/	2	N	N
male	43	31.8	20	1060	L	multiple	pelvis	2	80	2	94580.8	GradeI	2	N	Y
male	69	31.6	25	1004	L	single	pelvis	1	110	3	42314.7	/	1	Y	Y
female	59	30.7	22	1120	R	single	pelvis	1	120	3	47843.7	/	1	N	Y
Female	36	30.6	22	1072	R	multiple	pelvis	2	90	2	94300.4	GradeI	2	N	Y
male	55	38.5	28	1055	L	single	pelvis	2	102	4	46509.5	/	1	Y	Y
female	33	30.5	20	1284	R	single	lower	1	80	2	93400.6	/	2	N	Y
female	55	31	20	1072	L	single	lower	1	85	2	94524.6	GradeI	2	N	Y
male	59	32.6	29	817	L	multiple	multiple	1	150	3	45656.8	/	1	Y	Y
female	52	31.6	25	952	R	multiple	pelvis	1	90	2	93046.8	GradeI	2	N	Y
male	24	37.7	27	565	L	multiple	pelvis	1	75	2	95684.3	/	2	N	Y
male	37	38.6	26	864	L	multiple	pelvis	1	60	2	46663.5	/	1	N	Y
male	68	34.1	20	575	L	single	pelvis	1	82	2	43780.6	/	1	Y	Y
male	41	32.5	22	395	R	multiple	pelvis	2	90	2	44506.8	/	1	N	N
male	60	34.6	21	508	R	multiple	multiple	1	100	4	94534.7	/	2	N	N
male	47	33.7	30	955	L	multiple	middle	1	110	4	47325.7	/	1	Y	Y
male	43	31.8	30	1069	L	single	pelvis	1	130	3	43570.3	/	1	Y	Y
female	34	32.6	20	612	L	multiple	lower	1	80	2	44658.2	/	1	Y	Y
female	43	34.7	22	1302	R	multiple	lower	2	80	2	89000.4	GradeI	2	N	Y
male	54	37.8	25	1348	R	multiple	lower	2	100	3	85675.8	/	2	N	Y
female	32	34.6	20	538	L	multiple	upper	2	85	3	43245.1	/	1	Y	Y
male	79	30.5	30	984	L	multiple	lower	2	120	2	93004.6	/	2	N	Y
male	39	39	20	963	R	multiple	pelvis	1	110	3	43518.3	/	1	N	Y
male	49	37.6	29	1015	L	single	pelvis	1	90	2	44280.4	/	1	N	Y
male	51	33.7	20	834	R	multiple	multiple	1	85	3	93790.5	/	2	N	N
female	61	31.6	24	620	R	multiple	pelvis	1	75	2	44123.6	/	1	Y	Y
female	41	32.5	26	1060	R	multiple	lower	1	110	3	51023.5	/	1	Y	Y
male	28	36.7	30	525	L	multiple	multiple	2	140	4	93856.5	/	2	N	N
female	59	33.1	28	653	L	single	pelvis	2	140	4	45004.6	/	1	N	Y
male	22	32.7	22	1072	R	single	upper	2	82	2	44121.7	/	1	N	Y
male	31	35.7	20	626	R	single	pelvis	2	60	3	43441.6	/	1	Y	Y
male	48	35.8	20	845	L	single	pelvis	2	70	3	44342.7	/	1	Y	Y
male	34	34.8	30	470	R	single	pelvis	2	120	3	44246.7	/	1	N	Y
male	59	37.9	30	817	R	single	pelvis	2	120	3	43567.5	/	1	N	Y
male	22	38.2	21	466	R	single	lower	2	60	4	85632.7	/	2	N	Y
male	37	33.5	20	565	R	multiple	pelvis	2	60	5	47005.7	/	1	Y	Y
male	46	35.8	30	395	L	single	middle	2	120	3	45624.7	/	1	Y	Y
male	69	36.4	20	573	R	single	pelvis	2	105	3	44243.5	/	1	N	Y
male	49	38.9	30	784	R	multiple	multiple	2	120	3	84342.1	/	2	N	N
male	71	36.4	20	678	L	single	pelvis	2	90	4	46736.5	/	1	Y	Y
male	39	35.1	22	612	R	single	pelvis	2	75	3	45643.6	/	1	Y	Y
male	33	35.9	23	546	R	single	pelvis	2	90	4	43178.8	/	1	Y	Y
male	64	32.8	21	576	R	multiple	pelvis	2	90	3	45623.8	/	1	Y	Y
female	56	34.3	25	945	R	single	pelvis	2	90	2	46245.9	/	1	Y	Y
male	55	32.7	30	798	L	multiple	multiple	2	120	2	44214.2	/	1	Y	Y
male	69	32.6	20	963	L	multiple	pelvis	2	70	2	43262.4	/	1	Y	Y
female	49	30.7	30	1102	L	single	pelvis	2	130	2	44674.9	/	1	N	Y
female	40	31.8	30	853	L	single	lower	2	140	3	46321.6	/	1	N	Y
female	36	32.4	25	840	L	single	middle	2	100	4	45680.8	/	1	Y	Y
male	53	33.6	30	883	R	single	multiple	2	120	2	47800.6	/	1	Y	Y
male	46	36.4	20	984	L	multiple	middle	2	75	3	44580.4	/	1	N	Y
female	42	32.5	30	1150	R	single	upper	2	140	3	45400.4	/	1	N	Y
male	50	33.5	25	900	R	multiple	multiple	2	135	4	44502.8	/	1	Y	Y
female	64	32.7	20	946	L	multiple	lower	2	60	2	46400.2	/	1	N	N
female	59	35.3	28	683	R	multiple	pelvis	3	105	2	43156.8	/	1	Y	Y
female	48	33.4	23	538	R	multiple	lower	2	90	3	47200.8	/	1	N	N
male	29	37.5	24	478	L	single	pelvis	3	85	3	94130.6	/	2	N	Y
female	22	34.3	20	528	L	single	upper	3	70	3	44360.8	/	1	Y	Y
female	38	32.5	25	635	L	multiple	multiple	3	105	3	45656.8	/	1	Y	Y
female	52	35.1	23	1002	L	single	pelvis	3	70	3	46663.5	/	1	N	Y
female	64	35.9	25	717	L	multiple	pelvis	2	90	5	43780.6	/	1	Y	Y
male	56	32.8	23	1229	L	multiple	multiple	2	100	3	44503.8	/	1	Y	Y
male	44	32.5	25	1160	L	single	lower	2	90	3	44523.8	/	1	Y	Y
male	66	32.7	25	442	L	single	pelvis	2	90	2	45400.2	/	1	Y	Y
male	50	33.3	25	452	R	single	lower	2	75	5	45156.8	/	1	Y	Y
male	72	33.7	26	1041	R	single	upper	3	90	5	47201.1	/	1	Y	Y
female	54	34.7	25	1428	R	single	pelvis	3	95	3	48130.6	/	1	Y	Y
male	44	32.4	26	1100	L	single	middle	3	100	4	44360.5	/	1	Y	Y
male	67	33.6	25	583	R	single	pelvis	3	90	3	45670.2	/	1	Y	Y
female	53	36.4	25	661	R	single	lower	3	60	3	46004.6	/	1	Y	Y
male	53	33.7	25	427	L	multiple	multiple	3	110	5	45121.1	/	1	Y	Y
male	44	33.5	20	479	R	single	pelvis	3	80	4	47441.6	/	1	Y	Y
male	67	32.7	28	1012	L	multiple	multiple	2	80	5	42342.2	/	1	Y	Y
female	62	35.3	25	845	L	single	pelvis	2	100	3	45246.7	/	1	Y	Y
male	49	33.4	20	808	R	single	pelvis	2	85	3	46446.2	/	1	N	Y
male	63	37.5	27	1162	R	multiple	multiple	3	130	5	45346.1	/	1	Y	Y
female	45	34.3	20	993	R	single	pelvis	4	125	6	47351.5	GradeII	1	N	Y
male	43	35.1	20	1140	L	multiple	multiple	1	120	2	96502.8	/	2	N	N
male	46	35.9	20	837	L	single	lower	1	60	2	45331.5	/	1	N	Y
male	51	32.8	27	994	L	single	pelvis	1	60	3	45643.5	/	1	N	N
male	76	34.2	25	874	L	multiple	multiple	1	120	4	96502.8	GradeII	2	N	Y
male	76	32.7	20	690	L	single	lower	1	105	3	44321.6	/	1	Y	Y
male	27	32.6	21	337	L	multiple	multiple	1	100	3	89985.6	/	2	N	Y
female	29	32.1	20	470	L	single	pelvis	3	100	2	46890.5	/	1	N	Y
female	18	31.8	24	750	L	multiple	multiple	1	120	4	94040.6	GradeII	2	N	N
male	46	32.4	25	873	L	multiple	multiple	1	110	7	96500.6	/	2	N	Y
female	50	33.6	27	690	R	single	pelvis	2	100	19	54687.5	GradeII	1	N	Y
male	43	36.4	25	1300	L	multiple	multiple	2	105	5	95005.8	/	2	N	N
male	64	34.2	25	1400	R	multiple	multiple	1	90	4	92001.6	/	2	N	Y
male	63	33.5	25	1304	L	multiple	multiple	1	110	3	88450.4	/	2	N	Y
male	68	32.7	25	750	L	single	pelvis	3	95	4	47390.2	/	1	Y	Y
male	42	35.3	25	689	L	single	pelvis	2	100	5	44568.2	GradeII	1	Y	Y
male	39	33.4	30	941	R	multiple	multiple	3	110	4	96502.8	/	2	N	N
male	64	37.5	23	585	R	multiple	multiple	3	100	5	90021.2	/	2	N	Y
male	47	34.3	25	1465	L	single	lower	3	110	3	46983.4	/	1	Y	Y
