# Supplementary material for: A retrospective study comparing super-mini percutaneous nephrolithotomy and flexible ureteroscopy for the treatment of 20–30 mm renal stones in obese patients
Source: PeerJ. 2020 Feb 10;8:e8532. doi: 10.7717/peerj.8532 (PMC7017787; doi:10.7717/peerj.8532)
Supplement: Supplemental Information 2 [file peerj-08-8532-s002.xlsx]

## Sheet: Sheet1
sex	age	BMI	stone size(mm)	stone Ct value	side	stone number	location	ASA score		operation time	Double J Stent	HGB decrease	length of stay(d)(post-operative)	overal cost	complications	procedures	primary SFR	3-month SFR
male	42	33.2	27	1299	L	multiple	middle	1	SMP	90	Y	11	5	30008.9	GradeI	1	Y	Y
male	64	32.6	25	765	R	multiple	pelvis	1	SMP	90	Y	7	4	32030.6	/	1	Y	Y
male	52	31.8	25	654	L	multiple	multiple	1	SMP	90	Y	3	4	29030.6	/	1	Y	Y
male	47	31.6	21	1234	L	single	pelvis	1	SMP	60	Y	13	5	31080.5	GradeII	1	Y	Y
female	34	30.7	20	405	L	single	lower	2	SMP	60	N	0	5	28960.4	GradeII	1	Y	Y
female	71	30.6	21	667	L	single	pelvis	2	SMP	60	N	0	5	29540.3	GradeII	1	Y	Y
female	46	38.5	20	941	R	multiple	multiple	1	SMP	80	Y	3	6	30568.6	GradeII	1	Y	Y
male	46	30.5	30	986	L	single	pelvis	2	SMP	80	N	8	5	32302.4	/	1	Y	Y
male	65	31	20	563	R	multiple	middle	1	SMP	80	Y	7	4	29854.8	GradeI	1	Y	Y
male	58	32.6	23	1124	R	single	pelvis	2	SMP	80	N	12	5	29802.6	/	1	Y	Y
female	70	31.6	20	900	L	single	upper	1	SMP	100	N	4	9	28950.5	GradeI	1	Y	Y
male	39	37.7	25	667	L	single	pelvis	1	SMP	100	N	10	5	31235.8	/	1	Y	Y
female	64	38.6	20	941	R	multiple	multiple	1	SMP	100	Y	4	4	32357.8	GradeI	1	Y	Y
male	46	34.1	20	986	R	multiple	lower	1	SMP	100	Y	16	3	34320.3	/	1	Y	Y
male	49	32.5	20	563	L	single	lower	2	SMP	70	N	5	6	35201.6	/	1	Y	Y
male	33	34.6	30	824	L	multiple	pelvis	2	SMP	70	Y	0	3	40135.6	GradeI	1	Y	Y
female	22	33.7	26	1250	R	single	upper	2	SMP	80	Y	21	4	29579.4	/	1	Y	Y
female	62	31.8	30	752	R	single	pelvis	2	SMP	80	N	12	5	29102.6	/	1	Y	Y
male	33	32.6	23	1126	L	multiple	pelvis	2	SMP	70	Y	12	3	56039.8	GradeII	2	N	Y
male	46	34.7	28	1300	L	multiple	multiple	3	SMP	90	Y	2	6	58300.4	/	2	N	N
male	67	37.8	22	1010	L	multiple	multiple	3	SMP	110	Y	4	6	61002.5	GradeI、GradeII	2	N	Y
male	34	34.6	25	748	R	multiple	multiple	3	SMP	90	Y	8	3	55030.5	/	2	N	Y
male	50	30.5	23	1152	L	multiple	multiple	3	SMP	90	Y	4	4	59458.6	GradeII	2	N	Y
male	43	33	25	406	R	multiple	multiple	2	SMP	100	Y	13	5	33030.5	GradeII	1	Y	Y
male	44	37.6	20	665	R	single	pelvis	2	SMP	120	N	19	6	32002.4	/	1	Y	Y
male	42	33.7	20	1077	L	single	upper	2	SMP	105	Y	20	9	29590.6	GradeII	1	N	Y
male	57	31.6	20	1150	R	single	lower	2	SMP	85	N	9	3	29650.8	/	1	N	Y
female	53	32.5	21	721	L	single	pelvis	2	SMP	90	N	7	5	30110.6	GradeI	1	N	N
male	68	31.2	30	784	R	multiple	multiple	2	SMP	65	Y	7	3	32023.4	/	1	Y	Y
male	44	33.1	22	701	L	multiple	multiple	2	SMP	80	Y	18	3	30796.8	GradeIIIb	1	Y	Y
female	52	32.7	20	705	R	single	lower	3	SMP	75	N	12	6	31020.5	GradeI	1	Y	Y
male	32	35.7	26	704	L	single	pelvis	3	SMP	90	N	8	6	32018.6	/	1	Y	Y
male	43	35.8	22	902	R	multiple	multiple	2	SMP	70	Y	24	5	34100.5	GradeII	1	Y	Y
male	74	34.8	25	743	R	single	lower	2	SMP	80	Y	11	7	29800.8	GradeIIIb	1	Y	Y
female	62	33.3	30	1127	L	multiple	multiple	3	SMP	90	Y	11	4	32023.4	GradeI	1	N	N
male	66	33.2	25	1150	L	multiple	middle	2	SMP	90	Y	6	8	30796.8	/	1	Y	Y
male	51	33.5	23	807	R	multiple	multiple	2	SMP	100	Y	16	7	31020.5	GradeI	1	Y	Y
male	45	31.4	30	1200	R	multiple	pelvis	1	SMP	45	Y	49	5	38550.7	GRADE IIIa	1	Y	Y
female	22	33.2	28	756	R	multiple	lower	1	SMP	65	Y	14	4	26278.8	/	1	Y	Y
male	64	30.5	28	930	L	multiple	multiple	2	SMP	60	Y	11	3	23593.2	/	1	Y	Y
female	56	32.1	29	369	L	multiple	pelvis	1	SMP	50	Y	14	4	29138.2	/	1	Y	Y
female	47	31.3	25	956	L	multiple	lower	1	SMP	70	Y	11	4	24590.8	/	1	Y	Y
male	25	32.4	30	856	L	multiple	multiple	1	SMP	70	Y	8	5	29121.1	GRADE I	1	Y	Y
male	50	33.1	28	1113	R	multiple	lower	1	SMP	60	Y	12	6	28789.6	/	1	Y	Y
male	55	30.6	27	735	L	multiple	multiple	1	SMP	60	Y	13	6	30102.5	GRADE I	1	Y	Y
female	52	31.7	23	670	L	single	multiple	1	SMP	50	Y	8	8	27811	GRADE II	1	Y	Y
male	56	32	26	876	R	multiple	lower	1	SMP	35	N	7	4	32711.1	/	1	Y	Y
male	55	31.5	29	1211	L	single	pelvis	2	SMP	60	Y	7	6	31002.5	/	1	Y	Y
